---

## Long-term Coexistence of SARS-CoV-2 with Antibody Response

---

1

### Research Article

2

## Long-term Coexistence of Severe Acute Respiratory Syndrome

3

## Coronavirus 2 (SARS-CoV-2) with Antibody Response in

4

## Coronavirus Disease 2019 (COVID-19) Patients

5

6 Bin Wang<sup>#,1</sup>, Li Wang<sup>#,1</sup>, Xianggen Kong<sup>1</sup>, Jin Geng<sup>1</sup>, Di Xiao<sup>1</sup>, Chunhong Ma<sup>2</sup>,  
7 Xue-Mei Jiang<sup>1,\*</sup> & Pei-Hui Wang<sup>2,\*</sup>

8

9 <sup>1</sup>Jinan Infectious Diseases Hospital of Shandong University, Jinan, Shandong 250021, China

10 <sup>2</sup>Advanced Medical Research Institute, Shandong University, Jinan, Shandong 250012, China

11

12 <sup>#</sup>These authors contributed equally to this work

13 <sup>\*</sup>To whom correspondence should be addressed: Xue-Mei Jiang, [shdjxm@163.com](mailto:shdjxm@163.com); Pei-Hui Wang,  
14 [wphlab@163.com](mailto:wphlab@163.com)

15

16

## Long-term Coexistence of SARS-CoV-2 with Antibody Response

---

### 17 **Abstract**

18 Severe acute respiratory syndrome coronavirus 2 infection causing coronavirus  
19 disease 2019 has spread worldwide. Whether antibodies are important for the adaptive  
20 immune responses against SARS-CoV-2 infection needs to be determined. Here, 26  
21 cases of COVID-19 in Jinan, China, were examined and shown to be mild or with  
22 common clinical symptoms and no cases of severe symptoms were found among  
23 these patients. A striking feature of some patients is that SARS-CoV-2 could exist in  
24 patients who have virus-specific IgG antibodies for a very long period, with two cases  
25 for up to 50 days. One COVID-19 patient who did not produce any  
26 SARS-CoV-2-bound IgG successfully cleared SARS-CoV-2 after 46 days of illness,  
27 revealing that without antibody-mediated adaptive immunity, innate immunity may  
28 still be powerful enough to eliminate SARS-CoV-2. Overall, this report may provide a  
29 basis for further analysis of both innate and adaptive immunity in SARS-CoV-2  
30 clearance, especially in non-severe cases. This study also has implications for  
31 understanding the pathogenesis and treatment of SARS-CoV-2.

32

33 **Keywords:** SARS-CoV-2, COVID-19, adaptive immunity, innate immunity, IgG  
34 antibody

35

## Long-term Coexistence of SARS-CoV-2 with Antibody Response

---

36 The first severe acute respiratory syndrome coronavirus 2 (SARS-CoV-2)  
37 outbreak was reported in December 2019, and the virus has rapidly spread worldwide  
38 within 3 months (Wu et al., 2020; Zhou et al., 2020; Zhu et al., 2020). The importance  
39 of innate and adaptive immunity in the defense against SARS-CoV-1 needs to be  
40 urgently determined (Thevarajan et al., 2020). To fulfill the pressing need, we  
41 examined antibody generation and virus clearance in 26 patients with  
42 SARS-CoV-2-induced coronavirus disease 2019 (COVID-19) in Jinan, China.

43

44 A total of 26 patients from 5 to 72 years old were determined to be SARS-CoV-2  
45 RNA positive by sputum, stool, or nasopharyngeal swabs. The clinical characteristics  
46 of the patients and chest CT scans were also examined. According to the “Fifth  
47 Revised Trial Version of the Novel Coronavirus Pneumonia Diagnosis and Treatment  
48 Guidance”  
49 (<http://www.nhc.gov.cn/yzygj/s7652m/202002/41c3142b38b84ec4a748e60773cf9d4f>  
50 [.shtml](#)), all of them are non-severe COVID-19 patients (**Table 1**).

51

52 Immunoglobulin G (IgG) antibodies act as an indicator of recent and past  
53 infection, while IgM antibodies indicate current infection. SARS-CoV-2-bound IgG  
54 antibodies were detected in the serum of patients. For patients 3, 7, 22 and 24 (**Table**  
55 **1**), SARS-CoV-2 nucleic acid measurements became negative before antibodies were  
56 detected. Although IgG antibody testing was positive for the first trial in all 4 patients,  
57 we could not determine the exact role of IgG antibodies in SARS-CoV-2 clearance

## Long-term Coexistence of SARS-CoV-2 with Antibody Response

---

58 because innate immunity is also sufficient to eliminate this virus (refer to the case of  
59 patient 26). However, the results did reveal that the antibodies are produced early and  
60 SARS-CoV-2 is cleared up, indicating that the immediate production of antibodies  
61 may contribute to virus clearance.

62

63       Interestingly, we observed that specimens from patients 2, 8, 13, and 16 who had  
64 been confirmed to be IgG positive still tested positive for SARS-CoV-2 nucleic acid  
65 for more than 35 days (**Table 1**), indicating that SARS-CoV-2 can coexist with its  
66 specific antibodies in the human body for an unexpectedly long time (36-50 days).  
67 According to the data collected from patient 2, IgG antibodies can be produced at  
68 least as early as the 7th day post illness. (**Table 1**). The average number of days for  
69 SARS-CoV-2-bound IgG antibodies to be first detected in the 4 patients was 15; thus,  
70 the early production of antibodies does not mean early elimination of this virus. The  
71 production of specific antibodies is believed to be effective for virus clearance (Jiang,  
72 2020; Lu, 2020), but we could not reach such a conclusion from these cases. We did  
73 not observe a correlation between early adaptive immune responses and better clinical  
74 outcomes. Perhaps the specificity and titer of antibodies are more important. To our  
75 knowledge, to date, this is the longest period (36-50 days) to observe the coexistence  
76 of SARS-CoV-2 with its specific antibodies in COVID-19 patients. How this virus  
77 can circulate in the presence of specific antibodies for such a long time is an  
78 interesting question. Whether SARS-CoV-2 can act as HCV that have developed  
79 strategies to subvert humoral immunity and persists in the body is worth further

## Long-term Coexistence of SARS-CoV-2 with Antibody Response

---

80 investigation (Elsner et al., 2015; Fafi-Kremer et al., 2012; Takaya et al., 2019). These  
81 3 patients were all 23-39-year-old adults, which may suggest that young adult  
82 individuals do not have obvious advantages in the early production of antibodies and  
83 the clearance of SARS-CoV-2 compared to older persons (patients 10 and 21).

84

85 We observed that patient 26, a 5-10-year-old female, was SARS-CoV-2 nucleic  
86 acid positive in a stool sample after 46 days of illness but became nucleic acid testing  
87 negative in specimens of sputum, stool, and nasopharyngeal swabs on day 47 post  
88 illness (**Table 1**). No SARS-CoV-2-specific antibodies were detected in the patient's  
89 serum until the last sample collection day, which was the 66th day post illness.  
90 Although we did not collect data about virus-specific cellular immunity, it is known  
91 that cellular immunity is generated concomitantly with humoral immunity, so we  
92 could preliminarily exclude the potential role of cellular immunity in SARS-CoV-2  
93 elimination in this case. Thus, from the data on patient 26, we may conclude that  
94 innate immunity, the first line of host defense, can play an essential role in  
95 SARS-CoV-2 clearance; moreover, innate immunity alone might be enough to clear  
96 the virus. This case may also indicate that some individuals may not generate specific  
97 antibodies after infection with SARS-CoV-2; thus, only testing SARS-CoV-2-specific  
98 antibodies is not a good standard to determine infection, but combination with the  
99 nucleic acid testing method may improve the accuracy of SARS-CoV-2 detection.

100

101 Patient 25, another 5-10 year-old female, was found to be IgG antibody positive

## Long-term Coexistence of SARS-CoV-2 with Antibody Response

---

102 on the 10th day post illness, and the patient turned SARS-CoV-2 nucleic acid negative  
103 on 23rd day post illness (**Table 1**). We also observed that a 5-10 year-old female  
104 patient (patient 7) produced IgG antibodies on the 14th day post illness, and this  
105 patient turned SARS-CoV-2 nucleic acid negative on the 28th day post illness (**Table**  
106 **1**). These 2 cases may reveal that children do not show any defects in antibody  
107 production and SARS-CoV-2 elimination compared with adults.

108

109       Although a vaccine is believed to be the ultimate preventive measure against  
110 SARS-CoV-2 spread, generating a broadly protective and universal vaccine can take a  
111 long time (Lu, 2020). In this study, in the case of patient 26 (**Table 1**), we observed  
112 that innate immunity alone may be enough to completely clear SARS-CoV-2 infection.  
113 This is the first report that innate immunity plays such an essential role in the host  
114 defense against SARS-CoV-2, which highlights the importance of innate immunity in  
115 SARS-CoV-2 clearance. Further studies are required to determine which factors or  
116 signaling pathways of innate immunity contribute to this process. Whether individuals  
117 with such responses are still at risk for reinfection needs further exploration. Similar  
118 to other RNA viruses, SARS-CoV-2 RNA should be detected by endosomal Toll-like  
119 receptors (TLRs) and cytosolic RIG-I-like receptors or other RNA sensors that  
120 activate NLRP3 signaling, leading to the production of IFNs, ISGs, and  
121 proinflammatory cytokines (Kasumba and Grandvaux, 2019). Boosting innate  
122 immune signaling pathways, such as the TLR3 and RIG-I pathways, by drugs that  
123 mimic viral RNA may contribute to SARS-CoV-2 clearance (Kasumba and

## Long-term Coexistence of SARS-CoV-2 with Antibody Response

---

124 Grandvaux, 2019). However, these immune stimulators also induce an inflammatory  
125 response that may be harmful to patients; thus, antiviral immunity should be  
126 maximized, and inflammatory responses must be minimized. The inflammatory  
127 response that is responsible for the accumulation of cells and fluids contributes to  
128 SARS-CoV-2-induced lung injury (Huang et al., 2020; Wang et al., 2020). As immune  
129 stimulators, viral RNA mimics also induce an inflammatory response that may be  
130 harmful to patients; thus, a strategy, in which antiviral immunity should be maximized  
131 and inflammatory responses must be minimized, is challenging. Vaccine combined  
132 with innate immune stimulators may be more effective for fast SARS-CoV-2  
133 clearance. We propose that the importance of innate immunity should be investigated  
134 further and that the titer and specificity of SARS-CoV-2-specific antibodies are  
135 important and should be seriously considered in vaccine development.

136

137 Our study is limited by the current reagents used in this study, which cannot be  
138 used to determine the titer and specificity of human antibodies against SARS-CoV-2.  
139 The titer of specific antibodies correlated with clinical outcomes remains to be  
140 investigated. The long-term coexistence of IgG antibody with SARS-CoV-2 in the  
141 human body raises the question of whether patients with antibodies are still at risk for  
142 reinfection. Our follow-up studies may answer this question and would, therefore, be  
143 beneficial to vaccine development. Second, we did not collect the earliest serum of  
144 patients, and we could not determine on which day the SARS-CoV-2 bound IgG  
145 antibodies were generated. Thus, we could not observe the dynamic changes in IgG

## **Long-term Coexistence of SARS-CoV-2 with Antibody Response**

---

146 antibodies during illness and recovery. Third, we lack severe patients as controls;  
147 therefore, we do not know whether the adaptive immunity of severe patients can  
148 respond earlier because of their strong immune response and whether they can clear  
149 the virus faster after antibodies are produced. Despite that, our study provided several  
150 novel pieces of information about the innate and adaptive immune response against  
151 SARS-CoV-2: SARS-CoV-2 bound IgG antibodies can be generated as early as 7 days  
152 post illness but can coexist with SARS-CoV-2 in patients long-term (up to 50 days);  
153 without SARS-CoV-2 bound IgG antibodies, innate immunity can also successfully  
154 clear this virus.

155



## Long-term Coexistence of SARS-CoV-2 with Antibody Response

---

### 156 **Materials and Methods**

157       Specimens from sputum, stool, and nasopharyngeal swabs were collected  
158 throughout the illness from January 30, 2020, to April 5, 2020. Viral RNA was  
159 extracted from clinical specimens and real-time reverse transcription-PCR (rRT-PCR)  
160 was performed to test the presence of SARS-CoV-2 using “Novel coronavirus  
161 2019-nCoV nucleic acid detection kit” (Shanghai BioGerm Medical Biotechnology  
162 Co.,Ltd, China). The serum was collected at distinctive time points, and  
163 SARS-CoV-2-specific antibodies were detected using “New Coronavirus  
164 (2019-nCoV) Antibody Detection Kit” (INNOVITA, China). This study was approved  
165 by the ethics commissions of Jinan infectious disease hospital, Shandong, China.  
166

## **Long-term Coexistence of SARS-CoV-2 with Antibody Response**

---

### 167 **Acknowledgement**

168       This work was supported by grants from COVID-19 emergency tackling research

169 project of Shandong University (Grant No. 2020XGB03 to P.-H.W).

170

## Long-term Coexistence of SARS-CoV-2 with Antibody Response

---

### 171 **References**

- 172 Elsner, R.A., Hastey, C.J., Olsen, K.J., and Baumgarth, N. (2015). Suppression of  
173 Long-Lived Humoral Immunity Following *Borrelia burgdorferi* Infection. *PLoS*  
174 *Pathog* *11*, e1004976.
- 175 Fafi-Kremer, S., Fauvelle, C., Felmlee, D.J., Zeisel, M.B., Lepiller, Q., Fofana, I.,  
176 Heydmann, L., Stoll-Keller, F., and Baumert, T.F. (2012). Neutralizing antibodies  
177 and pathogenesis of hepatitis C virus infection. *Viruses* *4*, 2016-2030.
- 178 Huang, C., Wang, Y., Li, X., Ren, L., Zhao, J., Hu, Y., Zhang, L., Fan, G., Xu, J., Gu,  
179 X., *et al.* (2020). Clinical features of patients infected with 2019 novel  
180 coronavirus in Wuhan, China. *Lancet* *395*, 497-506.
- 181 Jiang, S. (2020). Don't rush to deploy COVID-19 vaccines and drugs without  
182 sufficient safety guarantees. *Nature* *579*, 321.
- 183 Kasumba, D.M., and Grandvaux, N. (2019). Therapeutic Targeting of RIG-I and  
184 MDA5 Might Not Lead to the Same Rome. *Trends Pharmacol Sci* *40*, 116-127.
- 185 Lu, S. (2020). Timely development of vaccines against SARS-CoV-2. *Emerg*  
186 *Microbes Infect* *9*, 542-544.
- 187 Takaya, A., Yamamoto, T., and Tokoyoda, K. (2019). Humoral Immunity vs.  
188 *Salmonella*. *Front Immunol* *10*, 3155.
- 189 Thevarajan, I., Nguyen, T.H.O., Koutsakos, M., Druce, J., Caly, L., van de Sandt, C.E.,  
190 Jia, X., Nicholson, S., Catton, M., Cowie, B., *et al.* (2020). Breadth of  
191 concomitant immune responses prior to patient recovery: a case report of  
192 non-severe COVID-19. *Nature Medicine*.

## Long-term Coexistence of SARS-CoV-2 with Antibody Response

---

193 Wang, D., Hu, B., Hu, C., Zhu, F., Liu, X., Zhang, J., Wang, B., Xiang, H., Cheng, Z.,  
194 Xiong, Y., *et al.* (2020). Clinical Characteristics of 138 Hospitalized Patients  
195 With 2019 Novel Coronavirus-Infected Pneumonia in Wuhan, China. JAMA.  
196 Wu, F., Zhao, S., Yu, B., Chen, Y.M., Wang, W., Song, Z.G., Hu, Y., Tao, Z.W., Tian,  
197 J.H., Pei, Y.Y., *et al.* (2020). A new coronavirus associated with human  
198 respiratory disease in China. Nature.  
199 Zhou, P., Yang, X.L., Wang, X.G., Hu, B., Zhang, L., Zhang, W., Si, H.R., Zhu, Y., Li,  
200 B., Huang, C.L., *et al.* (2020). A pneumonia outbreak associated with a new  
201 coronavirus of probable bat origin. Nature.  
202 Zhu, N., Zhang, D., Wang, W., Li, X., Yang, B., Song, J., Zhao, X., Huang, B., Shi, W.,  
203 Lu, R., *et al.* (2020). A Novel Coronavirus from Patients with Pneumonia in  
204 China, 2019. N Engl J Med 382, 727-733.  
205  
206

## Long-term Coexistence of SARS-CoV-2 with Antibody Response

207 **Table 1 Clinical characteristics of the 26 hospitalized SARS-CoV-2 patients and**  
 208 **corresponding timelines of IgG antibody production.**

| Patients | Gender/Age (Y.) | Type | IgG P. (D.)              | LDVP/specimens | Co-existence (D.) |
|----------|-----------------|------|--------------------------|----------------|-------------------|
| 1        | F/18-60         | C    | 22                       | 22/NP          | 0                 |
| 2        | M/18-60         | C    | 7                        | 57/St          | 50                |
| 3        | F/18-60         | C    | 23                       | 18/NP          | NA                |
| 4        | F/18-60         | C    | 16                       | 32/St          | 16                |
| 5        | F/18-60         | C    | 23                       | 29/NP          | 6                 |
| 6        | F/18-60         | C    | 21                       | 21/St          | 0                 |
| 7        | F/18-60         | M    | 9                        | 8/NP           | NA                |
| 8        | M/18-60         | C    | 23                       | 73/NP          | 50                |
| 9        | M/18-60         | C    | 10                       | 23/NP          | 13                |
| 10       | M/>60           | C    | 9                        | 19/Sp&NP       | 10                |
| 11       | M/18-60         | C    | 17                       | 20/NP          | 3                 |
| 12       | F/<18           | M    | 14                       | 28/St          | 14                |
| 13       | M/18-60         | C    | 15                       | 51/St          | 36                |
| 14       | F/18-60         | C    | 10                       | 25/SP          | 24                |
| 15       | M/18-60         | C    | 24                       | 36/NP          | 12                |
| 16       | F/18-60         | C    | 15                       | 60/NP          | 45                |
| 17       | M/18-60         | C    | 20                       | 36/SP          | 16                |
| 18       | M/18-60         | M    | 17                       | 24/NP          | 7                 |
| 19       | M/18-60         | C    | 12                       | 21/SP          | 9                 |
| 20       | F/18-60         | C    | 18                       | 20/NP          | 2                 |
| 21       | F/>60           | C    | 14                       | 20/NP          | 6                 |
| 22       | M/18-60         | M    | 10                       | 7/NP           | NA                |
| 23       | F/18-60         | C    | 15                       | 18/NP          | 3                 |
| 24       | F/18-60         | C    | 18                       | 17/NP          | NA                |
| 25       | F/<18           | C    | 10                       | 23/St          | 13                |
| 26       | F/<18           | M    | ND* ( 66 <sup>th</sup> ) | 46/St          | NA                |

209  
 210 **Y:** year; **IgG P:** IgG positive; **D:** Day; **LDP:** Last day post-illness when SARS-CoV-2  
 211 nucleic acid testing shows positive; **NP:** nasopharyngeal; **Sp:** sputum; **St:** stool. The  
 212 severity of COVID-19 was judged according to the “Fifth Revised Trial Version of the  
 213 Novel Coronavirus Pneumonia Diagnosis and Treatment Guidance”  
 214 ([http://www.nhc.gov.cn/yzygj/s7652m/202002/41c3142b38b84ec4a748e60773cf9d4f.](http://www.nhc.gov.cn/yzygj/s7652m/202002/41c3142b38b84ec4a748e60773cf9d4f.shtml)  
 215 [shtml](http://www.nhc.gov.cn/yzygj/s7652m/202002/41c3142b38b84ec4a748e60773cf9d4f.shtml)). **M:** mild type, the clinical symptoms were mild and no pneumonia was found  
 216 in imaging. **C:** common type, with fever, respiratory tract and other symptoms, the  
 217 manifestations of pneumonia can be seen on imaging. **NA:** not applicable; **ND:** not  
 218 detectable. \* IgG antibodies keep undetectable till 66th day post-illness for patient 26.  
 219
